# Supplementary material
Source: publisher figshare collection journal article supplement (https://karger.figshare.com/ndownloader/files/10668508)
Supplement: Supplementary file 1 [file 10668508]

**S-Table** **2**

|  | **EAU guideline recommendations in the course of time** | | | | | | | |
| --- | --- | --- | --- | --- | --- | --- | --- | --- |
|  | **2015** | **2012** | **2010** | **2009** | **2008** | **2005** | **2002** | **2001** |
| **SGCT** |  |  |  |  |  |  |  |  |
| **Radiotherapy** |  |  |  |  |  |  |  |  |
| *CT scan* | 6,12 | 6,12 | 6,12 | 6,12 | 6,12 | 6 | 6 | 6 |
| *X-ray chest* | 6,12 | 6,12 | 6,12 | 6,12 | 6,12 | 2,4,6,8,10,12 | 3,6,9,12 | 3,6,9,12 |
| *Markers* | 4,8,12 | 4,8,12 | 4,8,12 | 4,8,12 | 3,6,9,12 | 2,4,6,8,10,12 | 3,6,9,12 | 3,6,9,12 |
|  |  |  |  |  |  |  |  |  |
| **Carboplatin chemotherapy** |  |  |  |  |  |  |  |  |
| *CT scan* | 6,12 | 6,12 | 6,12 | 6,12 | 6,12 | 6 | 6 | 3,6,9,12 |
| *X-ray chest* | 6,12 | 6,12 | 6,12 | 6,12 | 6,12 | 2,4,6,8,10,12 | 3,6,9,12 | 2,4,6,8,10,12 |
| *Markers* | 4,8,12 | 4,8,12 | 4,8,12 | 4,8,12 | 3,6,9,12 | 2,4,6,8,10,12 | 3,6,9,12 | 2,4,6,8,10,12 |
|  |  |  |  |  |  |  |  |  |
| **NSGCT** |  |  |  |  |  |  |  |  |
| **BEP chemotherapy (1 - 2 cycles)** |  |  |  |  |  |  |  |  |
| *CT scan* | 6 | 6 | 6 | 6 | 6 | 6,12 | 6,12 | 6,12 |
| *X-ray chest* | 6,12 | 6,12 | 6,12 | 6,12 | 6,12 | 2,4,6,8,10,12 | 2,4,6,8,10,12 | 2,4,6,8,10,12 |
| *Markers* | 3,6,9,12 | 3,6,9,12 | 3,6,9,12 | 3,6,9,12 | 3,6,9,12 | 2,4,6,8,10,12 | 1,2,3,4,5,6,12 | 1,2,3,4,5,6,12 |
|  |  |  |  |  |  |  |  |  |
| **RPLND** |  |  |  |  |  |  |  |  |
| *CT scan* | 6 | 6 | 6 | 6 | 6 | 6,12 | 6,12 | 6,12 |
| *X-ray chest* | 6,12 | 6,12 | 6,12 | 6,12 | 6,12 | 2,4,6,8,10,12 | 2,4,6,8,10,12 | 2,4,6,8,10,12 |
| *Markers* | 3,6,9,12 | 3,6,9,12 | 3,6,9,12 | 3,6,9,12 | 3,6,9,12 | 2,4,6,8,10,12 | 1,2,3,4,5,6,12 | 1,2,3,4,5,6,12 |
